# Supplementary material for: Bio-inspired self-propelled diatom micromotor by catalytic decomposition of H2O2 under low fuel concentration
Source: Royal Society of Chemistry journal article supplement (doi:10.1039/c8nr04534h), 2018-01-01
Supplement: c8nr04534h1.pdf [file c8nr04534h1.pdf]

## Electronic Supplementary Information

### **Bio-inspired Self-Propelled Diatom Micromotor by Catalytic Decomposition of H<sub>2</sub>O<sub>2</sub> Under Low Fuel Concentration**

Atanu Panda,<sup>a</sup> Ankireddy Seshadri Reddy,<sup>b</sup> Sada Venkateswarlu,<sup>a</sup> Minyoung Yoon\*<sup>a</sup>

<sup>a</sup>Department of Nanochemistry, Gachon University, Sunnam 13120, Republic of Korea

<sup>b</sup>Department of Biochemical Engineering, Gachon University, Sunnam 13120, Republic of  
Korea.

\*Corresponding author. Tel.: +82-31-750-8721.

E-mail address: [myyoon@gachon.ac.kr](mailto:myyoon@gachon.ac.kr)

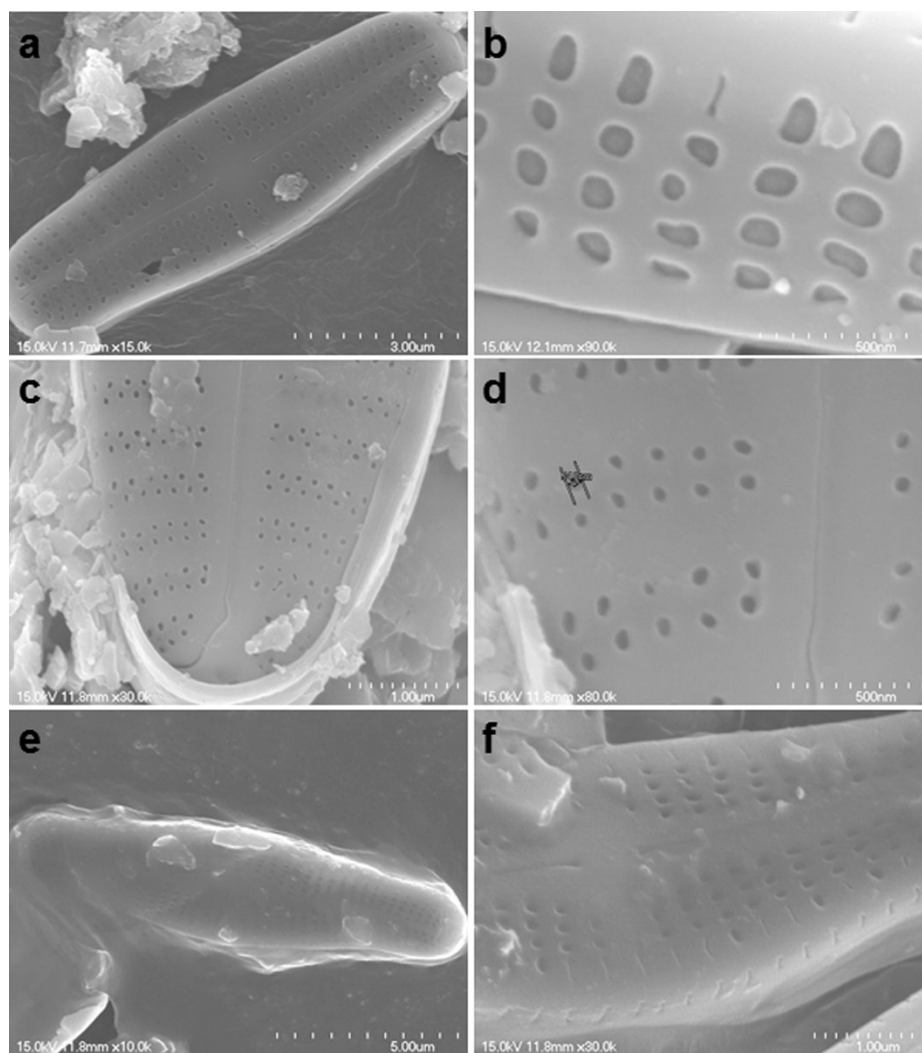

**Fig. S1.** SEM images of (a, b) pure diatom; (c, d) H<sub>2</sub>O<sub>2</sub>@diatom; and (e, f) EDTA- H<sub>2</sub>O<sub>2</sub>@diatom.

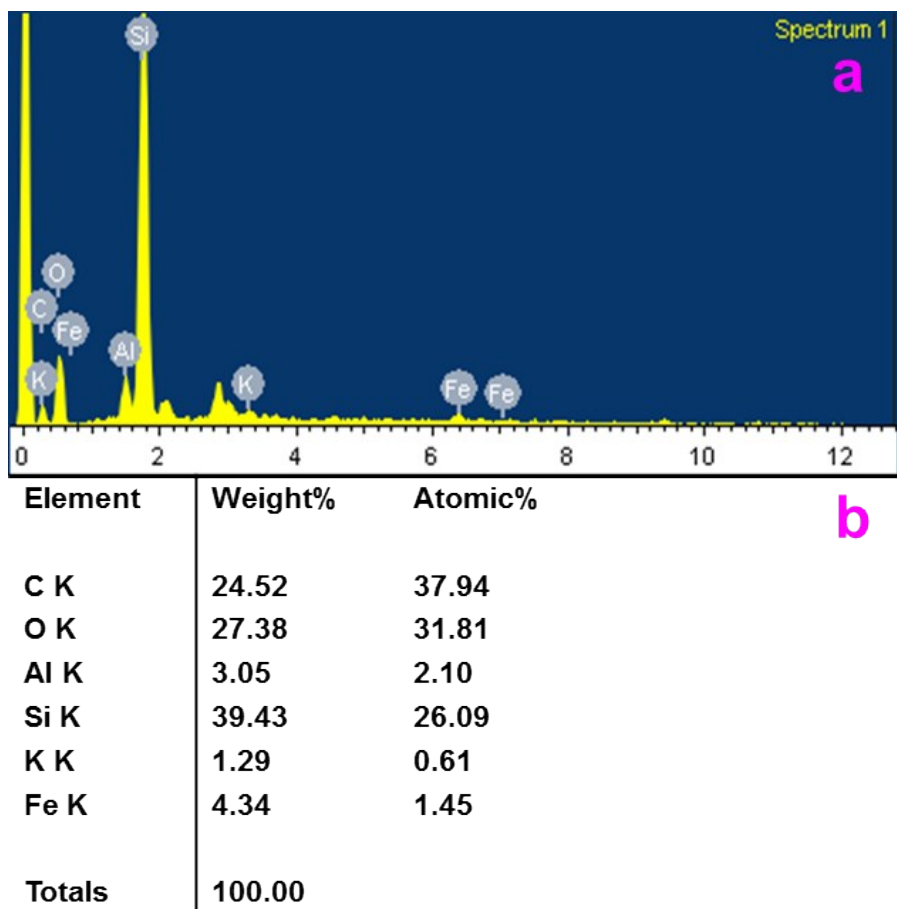

**Fig. S2.** (a) EDX of diatom and (b) elemental composition of diatom.

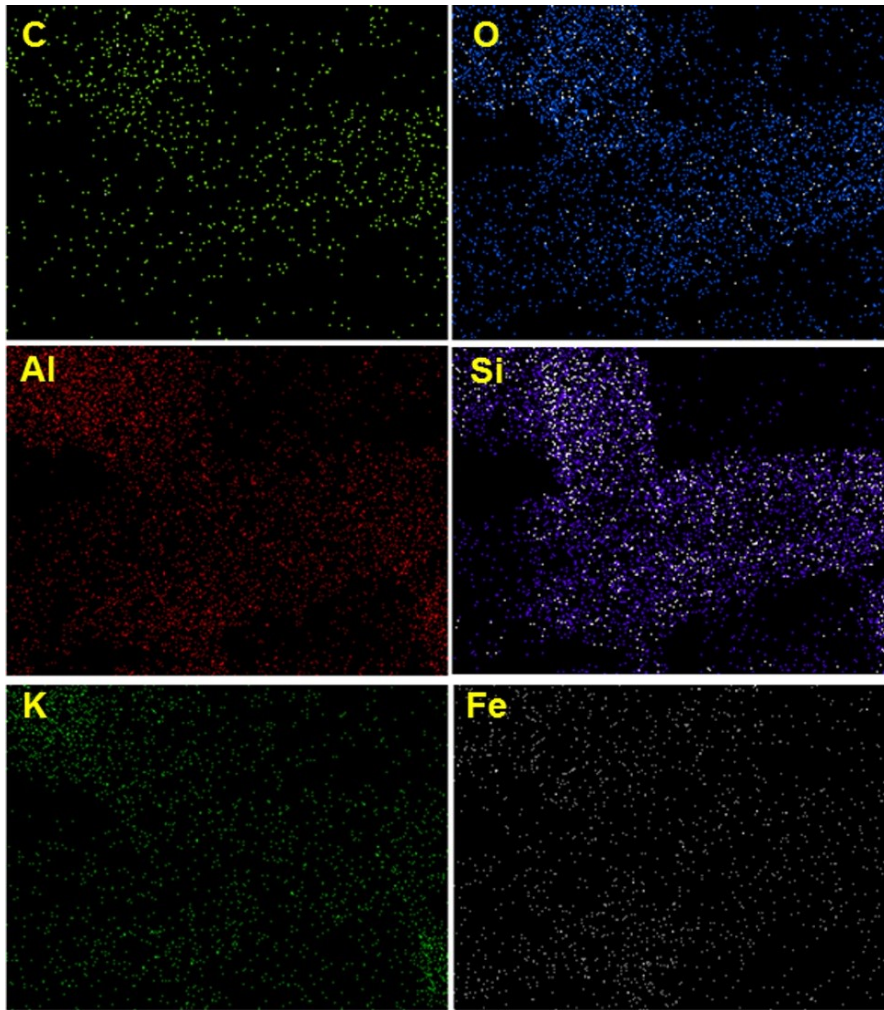

**Fig. S3.** Elemental mapping of diatom.

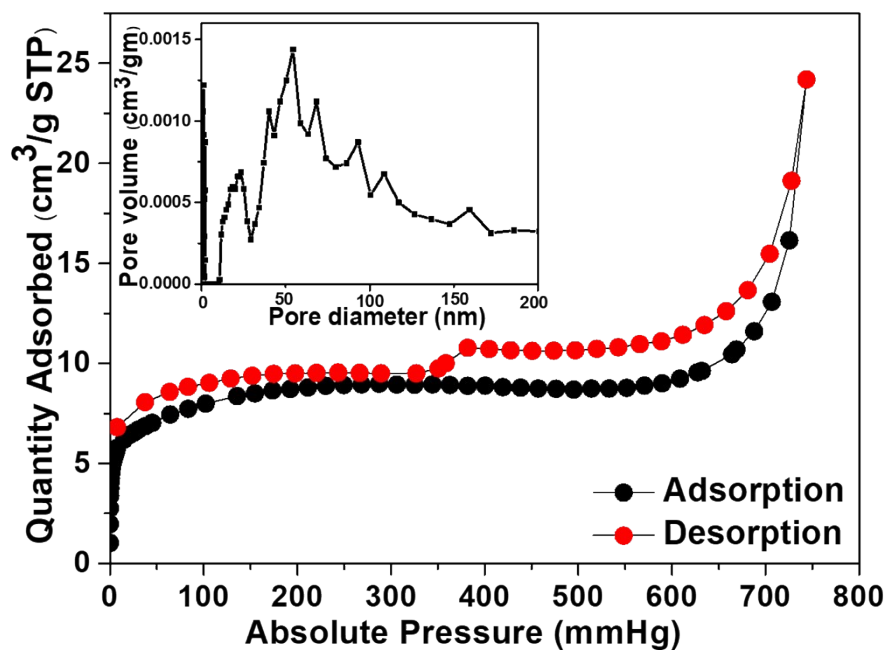

Fig. S4. BET surface area and pore-size distribution analysis of diatom.

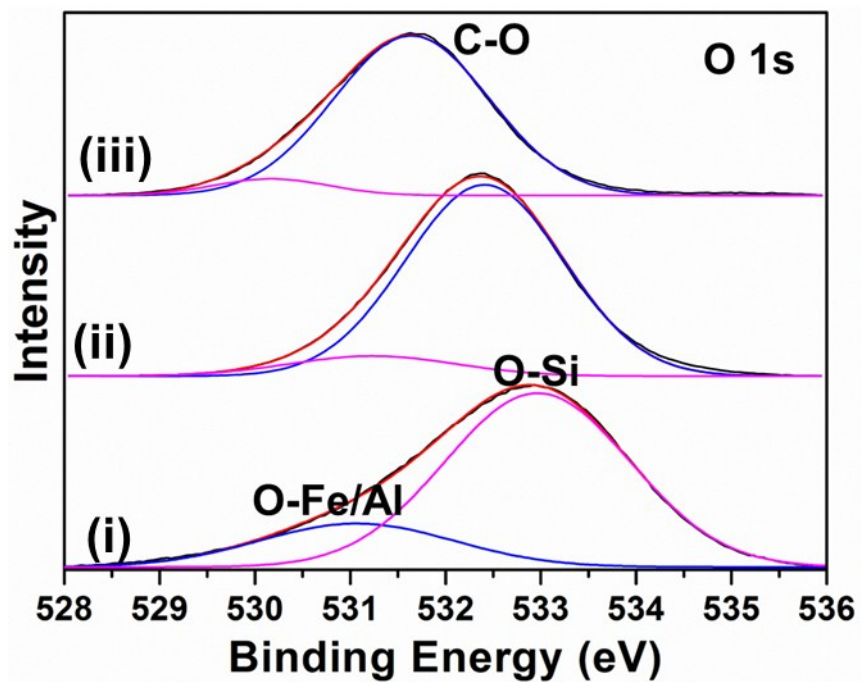

**Fig. S5.** High-resolution XPS spectrum of O 1s (i) pure diatom, (ii) H<sub>2</sub>O<sub>2</sub>@diatom and (iii) EDTA-H<sub>2</sub>O<sub>2</sub>@diatom.

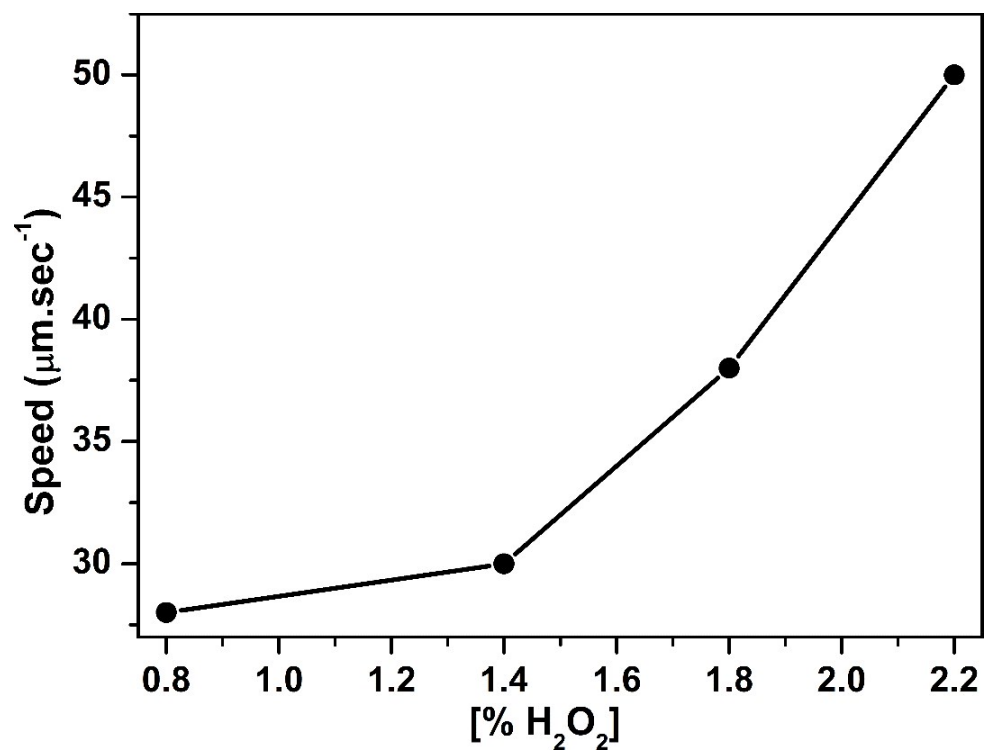

**Fig. S6.** Micro-motor speed with respect to fuel concentration (H<sub>2</sub>O<sub>2</sub>).

## DPPH free radical scavenging assay

Free radical-induced diatoms self-propulsion activity in the presence of 0.8 w/v%  $\text{H}_2\text{O}_2$  was examined using 2,2-diphenyl-1-picrylhydrazyl (DPPH) radical scavenging assay. Based on the standard protocol, bare DPPH, DPPH in the presence of diatoms, and DPPH in the presence of diatoms with  $\text{H}_2\text{O}_2$  have been recorded using UV-vis spectrophotometer. In a typical run, 500  $\mu\text{L}$  of 50  $\mu\text{M}$  DPPH was mixed with approximately 1 mg of diatoms in the presence or absence of 50  $\mu\text{L}$  of 0.8 w/v%  $\text{H}_2\text{O}_2$  in a vial. These vials were wrapped with the aluminum foil and incubated for 30 min at room temperature. The free radical generation has been measured using a UV-vis spectrophotometer after incubation (Fig. S7). All readings were recorded at ambient temperatures.

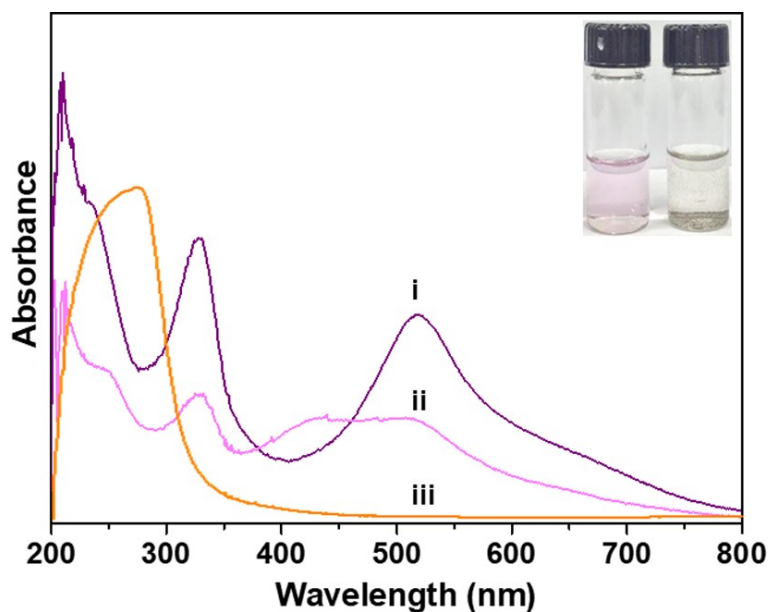

**Fig. S7** Free radical scavenging activity of (i) DPPH, (ii) DPPH with diatoms, (iii) DPPH with diatoms in the presence of  $\text{H}_2\text{O}_2$  and (inset photo) neat DPPH on left and DPPH with diatoms in the presence of  $\text{H}_2\text{O}_2$  (right).



**Table. S1** Normality of  $\text{KMnO}_4 = 0.001\text{N}$ , titrated against Sodium oxalate to get the normality of  $\text{KMnO}_4$

| <b>Time (min)</b> | <b>Volume of <math>\text{KMnO}_4</math> used (Blank <math>\text{H}_2\text{O}_2</math> in mL)</b> | <b>Volume of <math>\text{KMnO}_4</math> used (Diatom and <math>\text{H}_2\text{O}_2</math> in mL)</b> | <b>Volume of remaining <math>\text{KMnO}_4</math></b> | <b>% of Consumption of <math>\text{H}_2\text{O}_2</math></b> | <b>% of Consumption of <math>\text{H}_2\text{O}_2</math> after addition of EDTA</b> |
|-------------------|--------------------------------------------------------------------------------------------------|-------------------------------------------------------------------------------------------------------|-------------------------------------------------------|--------------------------------------------------------------|-------------------------------------------------------------------------------------|
| 0                 | 37                                                                                               | 37                                                                                                    | 13                                                    | 0                                                            | 0                                                                                   |
| 1                 | 37                                                                                               | 33                                                                                                    | 17                                                    | 11                                                           | 1.5                                                                                 |
| 3                 | 37                                                                                               | 24                                                                                                    | 26                                                    | 35                                                           | 4.5                                                                                 |
| 5                 | 36.5                                                                                             | 19                                                                                                    | 31                                                    | 49                                                           | 7.2                                                                                 |
| 10                | 36                                                                                               | 15                                                                                                    | 35                                                    | 60                                                           | 8                                                                                   |
| 15                | 36                                                                                               | 15                                                                                                    | 35                                                    | 60                                                           | 8                                                                                   |
